# Supplementary material for: Inside CKD: a microsimulation modelling study projects the clinical and economic burden of chronic kidney disease in Hungary
Source: Frontiers journal article supplement (doi:10.3389/fneph.2024.1458607), 2024-10-18
Supplement: Data_Sheet_1.pdf [file Data_Sheet_1.pdf]

## *Supplementary Material*

### Contents

|     |                                       |   |
|-----|---------------------------------------|---|
| 1   | Supplementary Figures and Tables..... | 2 |
| 1.1 | Supplementary Figures .....           | 2 |
| 1.2 | Supplementary Tables .....            | 4 |
| 2   | Supplementary references.....         | 8 |

# 1 Supplementary Figures and Tables

## 1.1 Supplementary Figures

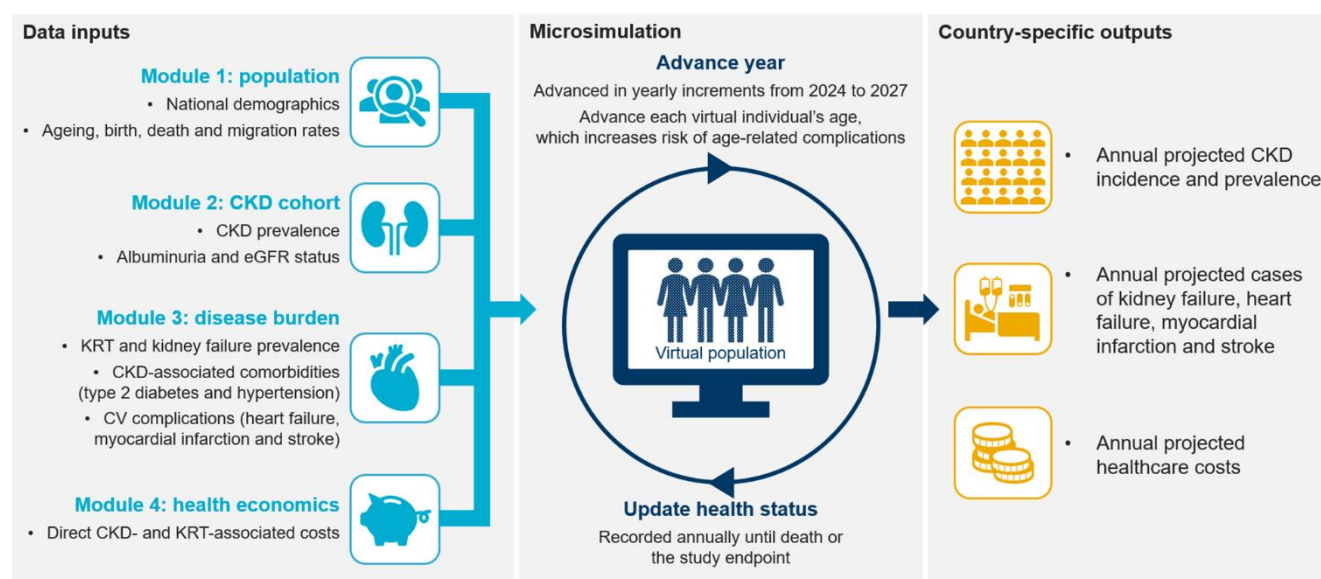

**Supplementary Figure 1.** Overview of the structure of the *Inside CKD* microsimulation model. CKD, chronic kidney disease; CV, cardiovascular; eGFR, estimated glomerular filtration rate; KRT, kidney replacement therapy. © CC BY-NC 2022. Figure adapted from: Projecting the Epidemiological and Economic Impact of Chronic Kidney Disease Using Patient-Level Microsimulation Modelling: Rationale and Methods of *Inside CKD*. N. Tangri *et al.* (Figure 2). <https://doi.org/10.1007/s12325-022-02353-5>. This work is licensed under a Creative Commons Attribution-NonCommercial 4.0 International License <http://creativecommons.org/licenses/by-nc/4.0/>.

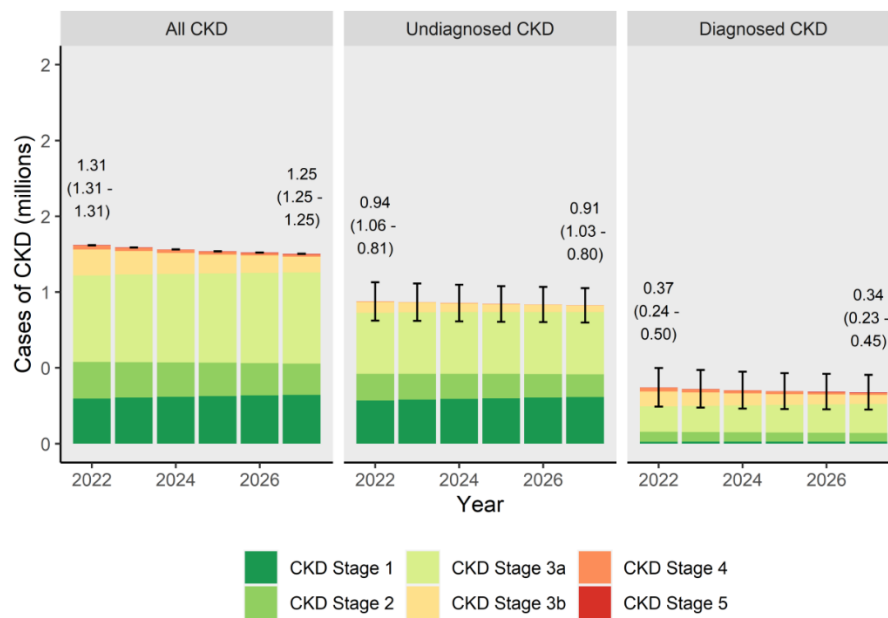

**Supplementary Figure 2.** Prevalence of CKD following sensitivity analysis of diagnosis rates in which an absolute 10% increase and a 10% decrease were applied to the diagnosis rate. Analysis by total, undiagnosed and diagnosed CKD are provided. The error bars represent the top and bottom estimates of CKD prevalence for a  $\pm 10\%$  difference in diagnosis rate. CKD, chronic kidney disease. © CC BY 2024. Projecting the clinical burden of chronic kidney disease at the patient level (*Inside CKD*): a microsimulation modelling study. G. Chertow *et al.* (Supplementary data appendix 1: sensitivity analysis on diagnosis rates). <https://doi.org/10.1016/j.eclim.2024.102614>. This work is licensed under a Creative Commons Attribution License <https://creativecommons.org/licenses/by/4.0/>.

## 1.2 Supplementary Tables

**Supplementary Table 1.** Definitions of CKD stages 1–5 used for the *Inside CKD* microsimulation.

| GFR<br>(mL/min/1.73 m <sup>2</sup> )             | AER                                                   |                                                |                                             |
|--------------------------------------------------|-------------------------------------------------------|------------------------------------------------|---------------------------------------------|
|                                                  | A1<br>(< 30 mg/24h;<br>normal to mildly<br>increased) | A2<br>(30–300 mg/24h;<br>moderately increased) | A3<br>(> 300 mg/24h;<br>severely increased) |
| ≥ 90 (normal; G1)                                | No CKD                                                | Stage 1                                        | Stage 1                                     |
| 60–89 (mildly decreased; G2)                     | No CKD                                                | Stage 2                                        | Stage 2                                     |
| 45–59<br>(mildly to moderately decreased; G3a)   | Stage 3a                                              | Stage 3a                                       | Stage 3a                                    |
| 30–44<br>(moderately to severely decreased; G3b) | Stage 3b                                              | Stage 3b                                       | Stage 3b                                    |
| 15–29 (severely decreased; G4)                   | Stage 4                                               | Stage 4                                        | Stage 4                                     |
| < 15 (kidney failure; G5)                        | Stage 5                                               | Stage 5                                        | Stage 5                                     |

AER, albumin excretion rate; CKD, chronic kidney disease; GFR, glomerular filtration rate.

## Supplementary Table 2. Clinical and economic data inputs.

Clinical parameters (CKD, KRT, comorbidities of CKD, cardiovascular complications of CKD, mortality and diagnosis rates) have been previously published. © CC BY 2024. Projecting the clinical burden of chronic kidney disease at the patient level (*Inside CKD*): a microsimulation modelling study. G. Chertow *et al.* (Table S2 [Hungary]). <https://doi.org/10.1016/j.eclinm.2024.102614>. This work is licensed under a Creative Commons Attribution License <https://creativecommons.org/licenses/by/4.0/>.

Health economic parameters have been previously published and adapted for use here. © CC BY-NC 2023. Global Economic Burden Associated with Chronic Kidney Disease: A Pragmatic Review of Medical Costs for the *Inside CKD* Research Programme. V. Jha *et al.* (Table S3, Table S4, Table S5). <https://doi.org/10.1007%2Fs12325-023-02608-9>. This work is licensed under a Creative Commons Attribution-NonCommercial 4.0 International License <http://creativecommons.org/licenses/by-nc/4.0/>.

| Parameter                | Reference                                                                                                                                                                                                              | Proxy country (if applicable)                    | Definitions                                                                                                                                                                                                                                                       |
|--------------------------|------------------------------------------------------------------------------------------------------------------------------------------------------------------------------------------------------------------------|--------------------------------------------------|-------------------------------------------------------------------------------------------------------------------------------------------------------------------------------------------------------------------------------------------------------------------|
| CKD                      |                                                                                                                                                                                                                        |                                                  |                                                                                                                                                                                                                                                                   |
| eGFR                     | Zdrojewski et al., 2015 [1]                                                                                                                                                                                            | Poland                                           | eGFR data by age and two risk categories, disaggregated using UK data                                                                                                                                                                                             |
| Albuminuria              | Chudek et al., 2014 [2]                                                                                                                                                                                                | Poland                                           | Albuminuria data by age and risk category                                                                                                                                                                                                                         |
| KRT                      |                                                                                                                                                                                                                        |                                                  |                                                                                                                                                                                                                                                                   |
| KRT initiation threshold | Pyart et al., 2020 [3]                                                                                                                                                                                                 | UK                                               |                                                                                                                                                                                                                                                                   |
| Chance of being treated  | O’Callaghan et al., 2011 [4]                                                                                                                                                                                           | UK                                               |                                                                                                                                                                                                                                                                   |
| Peritoneal dialysis      | 1. Calculated using NHIFA real-world data<br>2. MANET - Hungarian Society of Nephrology 2016–2019 [5]<br>3. NHIFA real-world data (data on file)<br>4. Analysis from national inpatient claims database (data on file) | Romania (annual risk of transplant failure only) | 1. Incidence and prevalence of patients receiving KRT who are undergoing peritoneal dialysis and haemodialysis<br>2. Prevalence of KRT per 100 000 by year<br>3. Transplantation rate per 100 dialysis patient-years<br>4. Annual risk of transplantation failure |
| Haemodialysis            |                                                                                                                                                                                                                        |                                                  |                                                                                                                                                                                                                                                                   |
| Transplantation          |                                                                                                                                                                                                                        |                                                  |                                                                                                                                                                                                                                                                   |
| Comorbidities of CKD     |                                                                                                                                                                                                                        |                                                  |                                                                                                                                                                                                                                                                   |
| Type 2 diabetes          | Analysis from national inpatient claims database (data on file)                                                                                                                                                        | Romania                                          | Proportion of type 2 diabetes and hypertension in the CKD population, by albuminuria level                                                                                                                                                                        |
| Hypertension             |                                                                                                                                                                                                                        |                                                  |                                                                                                                                                                                                                                                                   |

| Cardiovascular complications of CKD |                                                                               |     |                                                                                                                                                                                                        |
|-------------------------------------|-------------------------------------------------------------------------------|-----|--------------------------------------------------------------------------------------------------------------------------------------------------------------------------------------------------------|
| Heart failure                       | Hungarian NHIFA analysis, 2019 (data on file)                                 |     | Incidence and prevalence                                                                                                                                                                               |
|                                     | USRDS, 2009 [6]                                                               | USA | Relative risk                                                                                                                                                                                          |
| Myocardial infarction               | Hungarian NHIFA analysis, 2019 (data on file)                                 |     | Incidence and prevalence                                                                                                                                                                               |
|                                     | USRDS, 2009 [6]                                                               | USA | Relative risk                                                                                                                                                                                          |
| Stroke                              | Hungarian NHIFA analysis, 2019 (data on file)                                 |     | Incidence and prevalence                                                                                                                                                                               |
|                                     | Masson et al., 2015 [7]                                                       |     | Relative risk                                                                                                                                                                                          |
| Mortality                           |                                                                               |     |                                                                                                                                                                                                        |
| Mortality by CKD stage              | UN, World Population Prospects, 2019 [8, 9]                                   |     | Total number of deaths by age and sex                                                                                                                                                                  |
|                                     | Levey et al., 2011 [10]                                                       |     | Probability of dying from any cause by CKD stage                                                                                                                                                       |
| Diagnosis rates                     |                                                                               |     |                                                                                                                                                                                                        |
| Diagnosis rates by stage            | Hirst et al., 2020 [11]                                                       | UK  | Stages 1 and 2                                                                                                                                                                                         |
|                                     | Average from TriNetX and LCED database analysis by AstraZeneca (data on file) | USA | Stages 3a and 3b                                                                                                                                                                                       |
|                                     | Bakris et al., 2020 [12]                                                      | USA | Stages 4 and 5                                                                                                                                                                                         |
| Health economics                    |                                                                               |     |                                                                                                                                                                                                        |
| CKD stage 3a                        | Analysis of Hungarian NHIFA database, 2022 (data on file)                     |     | Patients who had at least one relevant ICD-10 code reported in the payer's database which was retrospectively analysed using the Hungarian NHIFM data                                                  |
| CKD stage 3b                        |                                                                               |     |                                                                                                                                                                                                        |
| CKD stage 4                         |                                                                               |     |                                                                                                                                                                                                        |
| CKD stage 5 (pre-KRT)               |                                                                               |     |                                                                                                                                                                                                        |
| Haemodialysis                       |                                                                               |     | Included labour, medication, central expenditure, inpatient stay expenses (e.g. laundry, food), intensive care unit usage, operating theatre use, emergency care, pharmacy provisioning, and overheads |
| Peritoneal dialysis                 | NEAK curative-preventive care database [13]                                   |     |                                                                                                                                                                                                        |
| Transplant                          | Analysis of Hungarian NHIFA database, 2022 (data on file)                     |     |                                                                                                                                                                                                        |

|                              |                                                                 |         |                                                                                                                                                                                                          |
|------------------------------|-----------------------------------------------------------------|---------|----------------------------------------------------------------------------------------------------------------------------------------------------------------------------------------------------------|
| Transplant maintenance       | State Audit Office of Hungary, 2012                             |         | Average cost of maintenance of year 1 and year 2+ based on the state audit office of Hungary report; 9/1993 NM decree. DRG and ICPM database                                                             |
| Heart failure                | Analysis of Hungarian NHIFA database, 2022 (data on file)       |         | Inpatient costs include DRG financing, ratio x base fee, regulated in 9/1993 decree. Outpatient costs include that of an intervention, point value x base fee; pharmacy drug; public reimbursement costs |
| Stroke                       | Lorenzovici et al, 2020, [14]                                   | Romania | Inpatient hospital costs                                                                                                                                                                                 |
| Myocardial infarction        | Analysis from national inpatient claims database (data on file) | Romania | Includes labour, medication, central expenditure, inpatient stay expenses (laundry, food etc.), intensive care unit usage, operating theatre use, emergency care, pharmacy provisioning, and overheads   |
| GDP                          | The World Bank, 2021                                            |         | Year 2021                                                                                                                                                                                                |
| Total healthcare expenditure | Hungarian State Treasury (data on file)                         |         | Total national public healthcare expenditures in 2019                                                                                                                                                    |

CKD, chronic kidney disease; DRG, diagnosis-Related-Group financing system; eGFR, estimated glomerular filtration rate; GDP, gross domestic product; ICD, International Classification of Diseases; ICPM, International Classification of Procedures in Medicine; KRT, kidney replacement therapy; LCED, Explorys Linked Claims and Electronic Medical Records Data; MANET, Magyar Nephrologiai Társaság (Hungarian Nephrology Society); NEAK, Nemzeti Egészségbiztosítási Alapkezelő (National Health Insurance Fund); NHIFA, National Health Insurance Fund Administration; NHIFM, National Health Insurance Fund Manager; UN, United Nations; USRDS, United States Renal Data System; WHO, World Health Organization.

## 2 Supplementary references

1. Zdrojewski Ł, Zdrojewski T, Rutkowski M, *et al.* Prevalence of chronic kidney disease in a representative sample of the Polish population: results of the NATPOL 2011 survey. *Nephrol Dial Transplant* (2016) 31(3):433–9.
2. Chudek J, Wieczorowska-Tobis K, Zejda J, *et al.* The prevalence of chronic kidney disease and its relation to socioeconomic conditions in an elderly Polish population: results from the national population-based study PolSenior. *Nephrol Dial Transplant* (2014) 29(5):1073–82.
3. Pyart R, Evans K, Steenkamp R, *et al.* The 21st UK Renal Registry Annual Report: A Summary of Analyses of Adult Data in 2017. *Nephron* (2020) 144(2):59–66.
4. O’Callaghan CA, Shine B, Lasserson DS. Chronic kidney disease: a large-scale population-based study of the effects of introducing the CKD-EPI formula for eGFR reporting. *BMJ Open* (2011) 1(2):e000308.
5. Hungarian Society of Nephrology. MANET 2016–2019 (2020) <http://www.nephrologia.hu/info.aspx?sp=200> (accessed Aug 01, 2021). [Hungarian].
6. US Renal Data System, USRDS 2009 Annual Data Report: Atlas of Chronic Kidney Disease and EndStage Renal Disease in the United States (2009) [https://www.usrds.org/2009/pdf/V1\\_06\\_09.pdf](https://www.usrds.org/2009/pdf/V1_06_09.pdf). (accessed Aug 01, 2022).
7. Masson P, Webster A, Hong M, *et al.* Chronic kidney disease and the risk of stroke: a systematic review and meta-analysis. *Nephrol Dial Transplant* (2015) 30(7):1162–9.
8. United Nations. Deaths by age groups, male. World population prospects 2019 (2019). <https://population.un.org/wpp/Download/Archive/Standard/> (accessed May 4, 2022).
9. United Nations. Deaths by age groups, female. World population prospects 2019 (2019). <https://population.un.org/wpp/Download/Archive/Standard/> (accessed May 4, 2022).
10. Levey AS, de Jong P, Coesh J, *et al.* The definition, classification, and prognosis of chronic kidney disease: a KDIGO Controversies Conference report. *Kidney Int* (2011) 80(1):17–28.
11. Hirst JA, Hill N, O’Callaghan C, *et al.* Prevalence of chronic kidney disease in the community using data from OxRen: A UK population-based cohort study. *Br J Gen Pract* (2020) 70(693):e285–93.
12. Bakris G. Prevalence and factors associated with undiagnosed chronic kidney disease in diabetes mellitus (2020) <https://casehippo.com/spa/symposium/national-kidney-foundation-2019-spring-clinicalmeetings/event/gallery/abstracts?abstractId=119> (accessed Aug 01, 2021).
13. NEAK curative-preventative care database. Performance data of artificial kidney treatments. (2022) [Accessed: April 2023]; Available from: [https://neak.gov.hu/pfile/file?path=/letoltheto/altfin\\_dok/altfin\\_virt\\_dok2/publikus\\_adatok\\_gy](https://neak.gov.hu/pfile/file?path=/letoltheto/altfin_dok/altfin_virt_dok2/publikus_adatok_gy)



me/alapdijak\_telj\_adatok/A\_gyogyito-  
megelozo\_ellatasokra\_vonatkozo\_kozerdeku\_adatok&inline=true.

14. Lorenzovici, L., et al., Cost Assessment of Inpatient Care Episodes of Stroke in Romania. *Front Public Health*, (2020) 4(8):e605919.
15. The World Bank. GDP (current US\$) – Hungary (2021) [Accessed Aug 01 2021; Available from: <https://data.worldbank.org/indicator/NY.GDP.MKTP.CD?locations=HU>
